# Supplementary material
Source: publisher figshare collection journal article supplement (https://tandf.figshare.com/ndownloader/files/22114380)
Supplement: Supplementary file 1 [file 22114380]

**Supplementary File**

**Figure S1:** Calibration curve for determination of concentration of (a) RDX, (b) HMX

**Figure S2:** Langmuir adsorption isotherm for sorption of (a) RDX on α-Fe2O3-rGO, (b) HMX on
α-Fe2O3-rGO, (c) RDX on nZVI/rGO and (d) HMX on nZVI/rGO at pH 6 and 30 oC

**Figure S3:** Freundlich adsorption isotherm for sorption of (a) RDX on α-Fe2O3-rGO, (b) HMX on α-Fe2O3-rGO, (c) RDX on nZVI/rGO and (d) HMX on nZVI/rGO at pH 6 and 30 oC

**Figure S1**


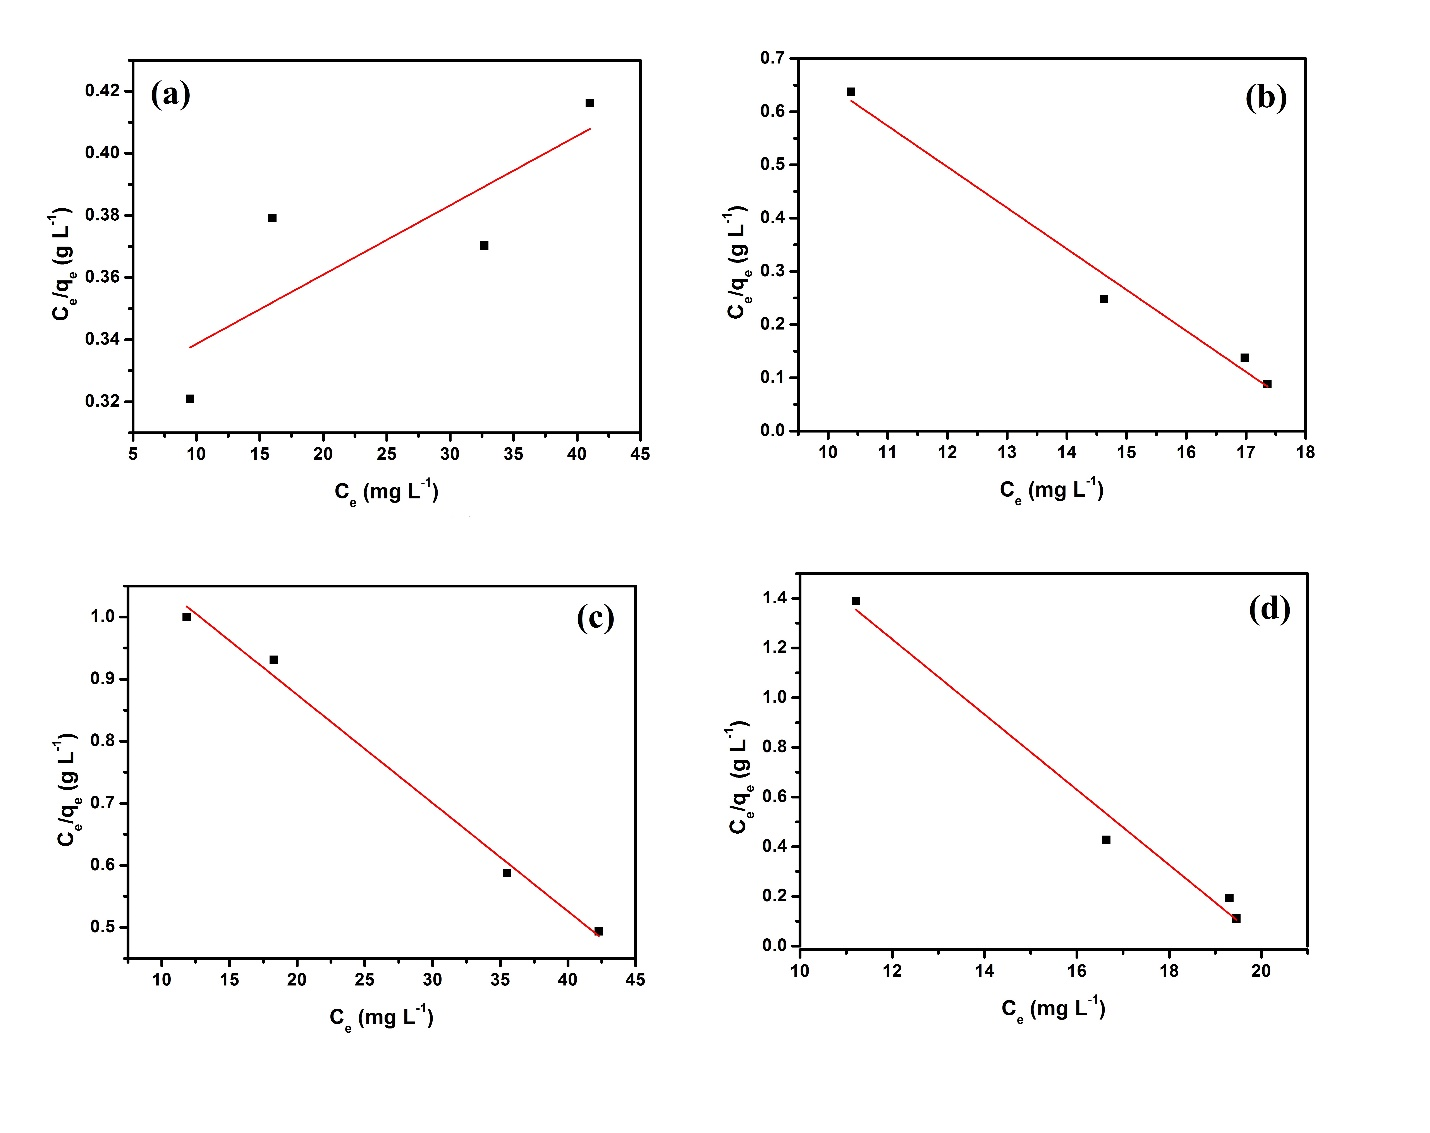


**Figure S2**


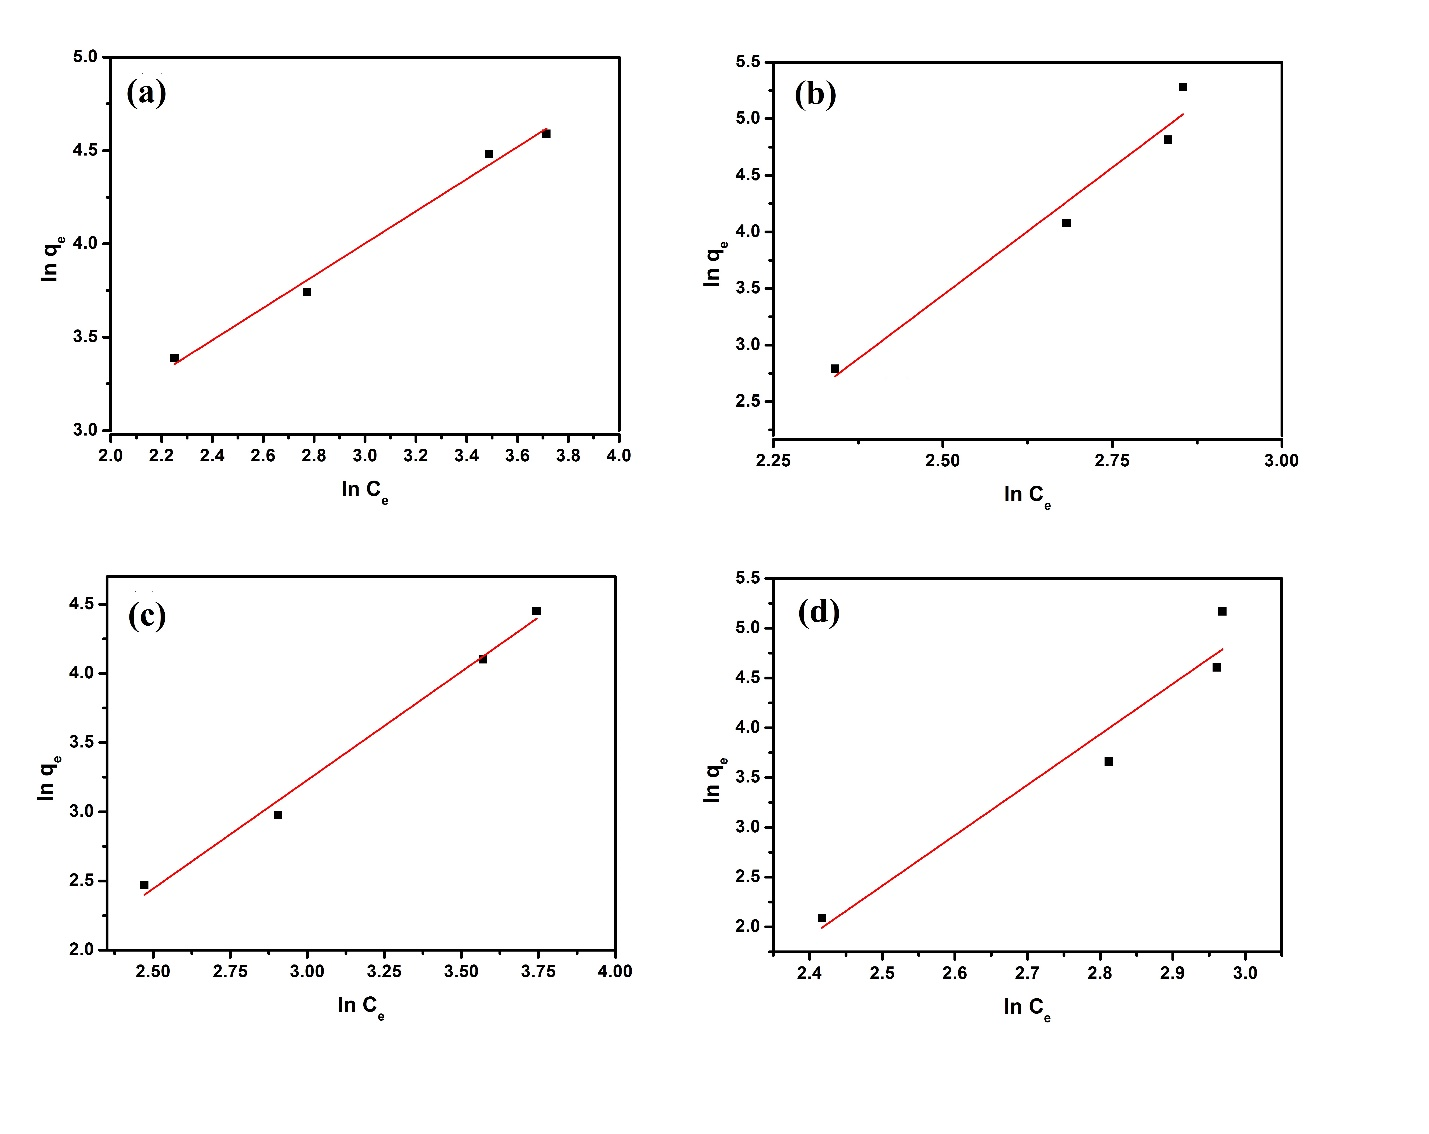


**Figure S3**
